# Supplementary material for: Glioma consensus contouring recommendations from a MR-Linac International Consortium Research Group and evaluation of a CT-MRI and MRI-only workflow
Source: PubMed Central journal article supplement (PMC7541359; doi:10.1007/s11060-020-03605-6), 2020-08-29
Supplement: 11060_2020_3605_MOESM1_ESM.pdf [file 11060_2020_3605_MOESM1_ESM.pdf]

**Table S1. Summary STAPLE and Dice similarity coefficient (DSC) analysis for organs-at-risk (OARs) for all 10 cases among participating physicians**

| Organs-at-risk (OAR) | Mean SENS |        | Mean SPEC |        | Mean Kappa ( $\kappa$ ) |        |          | Mean DSC |        |          |
|----------------------|-----------|--------|-----------|--------|-------------------------|--------|----------|----------|--------|----------|
|                      | MRI-Only  | CT-MRI | MRI-Only  | CT-MRI | MRI-Only                | CT-MRI | P-value  | MRI-Only | CT-MRI | P-value  |
| Brainstem            | 0.91      | 0.92   | 0.99      | 0.99   | 0.90                    | 0.90   | 0.99     | 0.88     | 0.88   | 0.98     |
| Optic Chiasm         | 0.58      | 0.58   | 1.00      | 1.00   | 0.60                    | 0.60   | 0.97     | 0.49     | 0.49   | 0.92     |
| Globe (L)            | 0.93      | 0.93   | 0.99      | 0.99   | 0.89                    | 0.89   | 0.87     | 0.89     | 0.89   | 0.70     |
| Globe (R)            | 0.93      | 0.93   | 0.99      | 0.99   | 0.90                    | 0.89   | 0.93     | 0.90     | 0.90   | 0.89     |
| Lens (L)             | 0.76      | 0.76   | 1.00      | 1.00   | 0.77                    | 0.77   | 0.86     | 0.72     | 0.71   | 0.45     |
| Lens (R)             | 0.73      | 0.73   | 1.00      | 1.00   | 0.74                    | 0.74   | 0.92     | 0.69     | 0.69   | 0.70     |
| Cochlea (L)          | 0.43      | 0.68   | 0.99      | 1.00   | 0.39                    | 0.71   | < 0.0001 | 0.17     | 0.62   | < 0.0001 |
| Cochlea (R)          | 0.42      | 0.67   | 0.99      | 1.00   | 0.41                    | 0.69   | < 0.0001 | 0.20     | 0.59   | < 0.0001 |
| Optic Nerve (L)      | 0.68      | 0.67   | 1.00      | 1.00   | 0.75                    | 0.74   | 0.71     | 0.65     | 0.64   | 0.34     |
| Optic Nerve (R)      | 0.67      | 0.67   | 1.00      | 1.00   | 0.74                    | 0.73   | 0.98     | 0.63     | 0.63   | 0.91     |

Abbreviations: SENS = STAPLE sensitivity; SPEC = STAPLE specificity; DSC = Dice coefficient; MRI = magnetic resonance imaging; CT = computed tomography; L = left; R = right

**Table S2. Comparison of contour agreement pre- (cases 1-4) and post- (cases 5-10) on-site consensus meeting/workshop**

| Organs-at-risk (OAR) | Kappa ( $\kappa$ ) MRI-Only Workflow |                   |         | Kappa ( $\kappa$ ) CT-MRI Workflow |                   |         |
|----------------------|--------------------------------------|-------------------|---------|------------------------------------|-------------------|---------|
|                      | Pre-Meeting Mean                     | Post-Meeting Mean | P-value | Pre-Meeting Mean                   | Post-Meeting Mean | P-value |
| GTV                  | 0.90                                 | 0.87              | 0.28    | 0.90                               | 0.87              | 0.22    |
| CTV                  | 0.86                                 | 0.90              | 0.07    | 0.87                               | 0.90              | 0.16    |
| Brainstem            | 0.91                                 | 0.89              | 0.28    | 0.91                               | 0.90              | 0.29    |
| Optic Chiasm         | 0.58                                 | 0.61              | 0.67    | 0.58                               | 0.61              | 0.63    |
| Globe (L)            | 0.87                                 | 0.90              | 0.01    | 0.87                               | 0.90              | 0.005   |
| Globe (R)            | 0.88                                 | 0.91              | 0.04    | 0.88                               | 0.91              | 0.03    |
| Lens (L)             | 0.78                                 | 0.77              | 0.85    | 0.76                               | 0.77              | 0.89    |
| Lens (R)             | 0.72                                 | 0.75              | 0.44    | 0.72                               | 0.75              | 0.35    |
| Cochlea (L)          | 0.34                                 | 0.42              | 0.40    | 0.64                               | 0.74              | 0.045   |
| Cochlea (R)          | 0.34                                 | 0.46              | 0.06    | 0.60                               | 0.73              | 0.02    |
| Optic Nerve (L)      | 0.74                                 | 0.75              | 0.82    | 0.73                               | 0.75              | 0.47    |
| Optic Nerve (R)      | 0.72                                 | 0.74              | 0.47    | 0.72                               | 0.74              | 0.49    |

**Table S3. Comparison of clinical target volume (CTV) findings/recommendations among published reports for glioblastoma multiforme (GBM)**

| <b>Study</b>                             | <b>Margin from Gross Tumor Volume (GTV)</b>                                                            | <b>Anatomical Barrier(s) of Spread</b>                                                                                                                                                                                                             | <b>Brainstem Extension</b>                                                                                                                                                                                                                                | <b>Optic Pathway Extension</b>                                                                                                            | <b>Commissural Extension</b>                                                                                                                                                                                                                                         |
|------------------------------------------|--------------------------------------------------------------------------------------------------------|----------------------------------------------------------------------------------------------------------------------------------------------------------------------------------------------------------------------------------------------------|-----------------------------------------------------------------------------------------------------------------------------------------------------------------------------------------------------------------------------------------------------------|-------------------------------------------------------------------------------------------------------------------------------------------|----------------------------------------------------------------------------------------------------------------------------------------------------------------------------------------------------------------------------------------------------------------------|
| Present study                            | 1.5 cm beyond surgical cavity and residual enhancing disease for GBM                                   | CTV should be limited, without additional margin, by the falx, tentorium cerebelli, and inner table of the skull; CTV does not need to be excluded from the ventricles, and should be included in event of ependymal or leptomeningeal involvement | No margin when enhancing tumor not situated along a contiguous white matter pathway; for tumors along white matter tracts (i.e. thalamus, internal capsule), CTV should extend into the brainstem (ipsilateral half or entire brainstem not well defined) | No margin at the optic nerves and chiasm; the optic tracts should not be excluded from the CTV when the GTV is in contiguity anatomically | CTV should cross into the contralateral hemisphere if the enhancing tumor encroaches on: corpus callosum (genu and splenium), anterior and posterior commissure; consider extension into the contralateral thalamus if enhancing tumor encroaches on medial thalamus |
| Wee et al. <sup>10</sup>                 | 1.5 cm (median) corresponding to minimal margins needed to cover at least 95% of CTV <sub>STAPLE</sub> | Not specified; constrain to potential barriers such as falx, tentorium, ventricular space                                                                                                                                                          | N/A                                                                                                                                                                                                                                                       | N/A                                                                                                                                       | N/A                                                                                                                                                                                                                                                                  |
| Niyazi et al. (ESTRO-ACROP) <sup>9</sup> | 2.0 cm recommended; no definite recommendation on inclusion of regions of abnormal T2/FLAIR            | Reduced margins at anatomical barriers at the skull (0 mm), ventricles (5 mm), falx (5 mm), tentorium cerebelli (5 mm), provided tumor is distant from white matter tracts extending to these regions                                              | No margin (0 mm), provided the tumor is distant from white matter tracts extending to it                                                                                                                                                                  | No margin (0 mm), provided the tumor is distant from white matter tracts extending to it                                                  | N/A                                                                                                                                                                                                                                                                  |
| Kruser et al.                            | CTV <sub>4600</sub> 2 cm beyond both                                                                   | Trim from infratentorial                                                                                                                                                                                                                           | CTV <sub>4600</sub> includes 2 cm                                                                                                                                                                                                                         | CTV <sub>4600</sub> includes 2 cm                                                                                                         | Avoid over-aggressive                                                                                                                                                                                                                                                |

|                    |                                                                                                 |                                                                                             |                                                                                                                                                                          |                                                                                                                                                                                 |                                              |
|--------------------|-------------------------------------------------------------------------------------------------|---------------------------------------------------------------------------------------------|--------------------------------------------------------------------------------------------------------------------------------------------------------------------------|---------------------------------------------------------------------------------------------------------------------------------------------------------------------------------|----------------------------------------------|
| (NRG) <sup>8</sup> | cavity/T1c-enhancement and T2/FLAIR hyperintensity; CTV_6000 2 cm beyond cavity/T1c-enhancement | brain for supratentorial tumors; trim CTV expansion directly to the falx (no margin beyond) | from T2-FLAIR if anatomic contiguity; CTV_6000 includes 2 cm from T1-contrast if anatomic contiguity (cover to 54 Gy); Gross disease included without margin in CTV_6000 | from T2-FLAIR if anatomic contiguity; CTV_6000 includes 2 cm from T1-contrast if anatomic contiguity (cover to 54 Gy); Gross disease included (allowing chiasm PRV up to 60 Gy) | trimming at the level of the corpus callosum |
|--------------------|-------------------------------------------------------------------------------------------------|---------------------------------------------------------------------------------------------|--------------------------------------------------------------------------------------------------------------------------------------------------------------------------|---------------------------------------------------------------------------------------------------------------------------------------------------------------------------------|----------------------------------------------|
